# Supplementary material for: Exploring the Impacts of Full-Scale Distribution System Orthophosphate Corrosion Control Implementation on the Microbial Ecology of Hydrologically Connected Urban Streams
Source: PubMed Central journal article supplement (PMC9769763; doi:10.1128/spectrum.02158-22), 2022-11-02
Supplement: spectrum.02158-22-s0001.pdf [file spectrum.02158-22-s0001.pdf]

## Supplementary Information & Data

### **Exploring the Impacts of Full-Scale Distribution System Orthophosphate Corrosion Control Implementation on the Microbial Ecology of Urban Streams**

*Isaiah Spencer-Williams<sup>1</sup>, Anusha Balangoda<sup>2</sup>, Richard Dabundo<sup>2</sup>, Emily Elliott<sup>2</sup>, and Sarah-Jane Haig<sup>1,3</sup>*

<sup>1</sup> *Department of Civil and Environmental Engineering, University of Pittsburgh, Pittsburgh, PA*

<sup>2</sup> *Department of Geology and Environmental Science, University of Pittsburgh, Pittsburgh, PA*

<sup>3</sup> *Department of Environmental & Occupational Health, School of Public Health, University of Pittsburgh, PA*

#### **TABLE OF CONTENTS**

**Figure A1:** Nonmetric multidimensional scaling (NMDS) plots of Bray-Curtis distances for the five urban stream sites sampled. The ellipses represent the 95% confidence interval of the distribution from the centroid of the cluster points.

**Figure A2:** Top 10 most abundant phyla in urban streams a) S1, b) S3, and c) S5 before and after PO<sub>4</sub><sup>3-</sup> addition in the distribution system. Streams S1, S3, and S5 all had the same top ten phyla represented. Significant changes in were observed in the relative abundances of *Acidobacteria*, *Planctomycetes*, and *Verrucomicrobia* in stream S1 while no significant differences were observed in streams S3 or S5.

**Figure A3:** Top 10 most abundant phyla in urban streams a) S2 and b) S4 before and after PO<sub>4</sub><sup>3-</sup> addition in the distribution system. Significant changes in were observed in the relative abundances of *Elusimicrobia* and *Omnitropicaeota* in stream S2 while significant differences were observed in *Omnitropicaeota* and *Planctomycetes* in stream S4.

**Figure A4:** Average phosphorus and nitrogen functional trait relative abundance of stream S1 before and after PO<sub>4</sub><sup>3-</sup> addition into the distribution system. \* represents a p-value < 0.05, \*\* represents a p-value < 0.01

**Figure A5:** Average phosphorus and nitrogen functional trait relative abundance of stream S2 stream before and after PO<sub>4</sub><sup>3-</sup> addition into the distribution system.

**Figure A6:** Average phosphorus and nitrogen functional trait relative abundance of stream S3 before and after PO<sub>4</sub><sup>3-</sup> addition into the distribution system.

**Figure A7:** Average phosphorus and nitrogen functional trait relative abundance of stream S4 before and after PO<sub>4</sub><sup>3-</sup> addition into the distribution system. \* represents a p-value < 0.05, \*\* represents a p-value < 0.01.

## **Supplementary Information & Data**

**Figure A8:** Average phosphorus and nitrogen functional trait relative abundance of stream S5 before and after  $\text{PO}_4^{3-}$  addition into the distribution system. \* represents a p-value < 0.05.

**Figure A9:** Total bacteria absolute abundance in urban streams before and after  $\text{PO}_4^{3-}$  addition into the distribution system. No significant differences were observed in any stream after  $\text{PO}_4^{3-}$  addition.

**Figure A10:** *Cyanobacteria* absolute abundance in urban streams before and after  $\text{PO}_4^{3-}$  addition into the distribution system. No significant differences were observed in any stream after  $\text{PO}_4^{3-}$  addition.

**Figure A11:** *Candidatus Accumulibacter* absolute abundance in urban streams before and after  $\text{PO}_4^{3-}$  addition into the distribution system. No significant differences were observed in any stream after  $\text{PO}_4^{3-}$  addition.

**Table A1:** Urban stream longitude / latitude, population density, land development

**Table A2:** Water quality parameters measured, method / apparatus, rationale

**Table A3:** ddPCR primers

**Table A4:** ddPCR reaction conditions

**Table A5:** ddPCR assay thresholds

**Table A6:** KEGG list of functional traits relating to phosphate or nitrogen metabolism

## Supplementary Information & Data

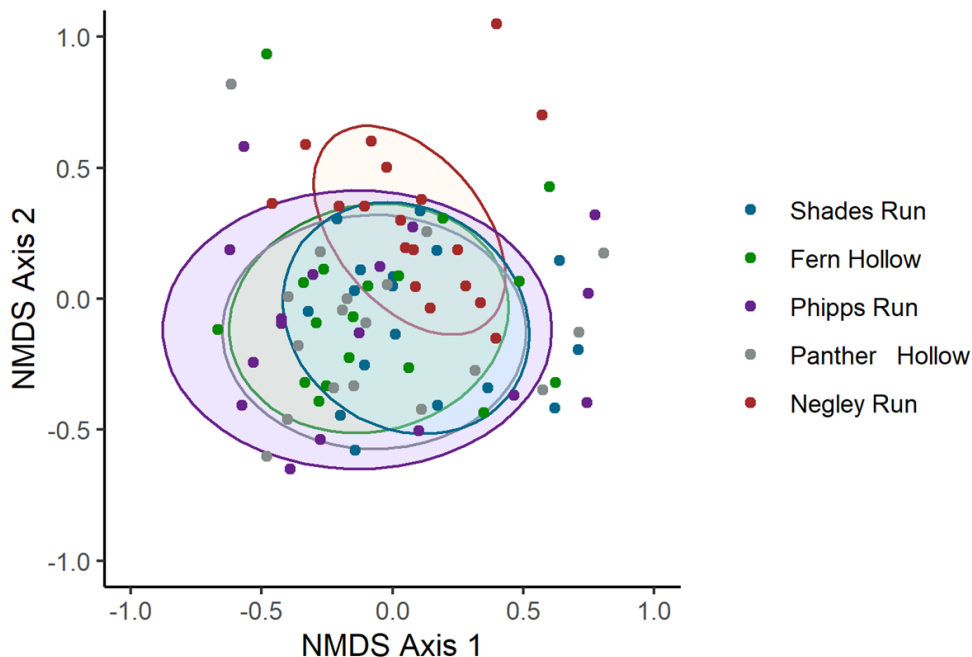

**Figure A1:** Nonmetric multidimensional scaling (NMDS) plots of Bray-Curtis distances for the five urban stream sites sampled. The ellipses represent the 95% confidence interval of the distribution from the centroid of the cluster points.

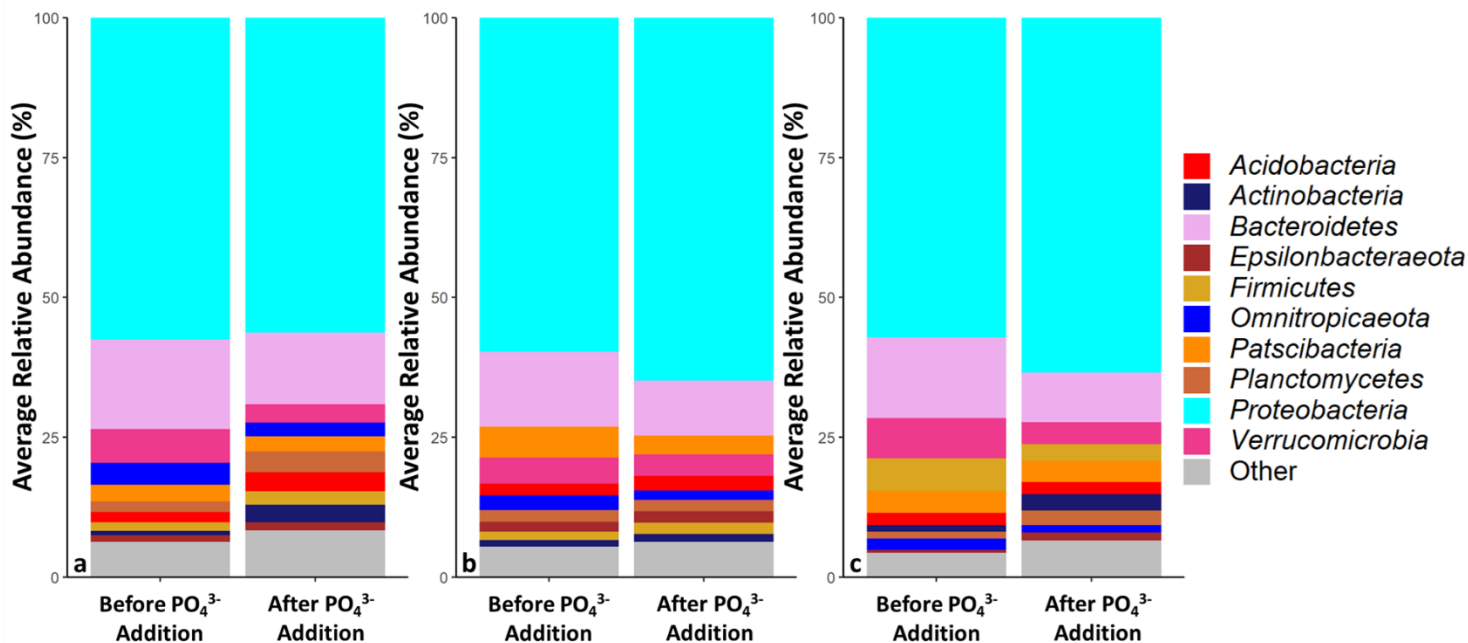

**Figure A2:** Top 10 most abundant phyla in urban streams a) S1, b) S3, and c) S5 before and after  $\text{PO}_4^{3-}$  addition in the distribution system. Streams S1, S3, and S5 all had the same top ten phyla represented. Significant changes in were observed in the relative abundances of *Acidobacteria*, *Planctomycetes*, and *Verrucomicrobia* in stream S1 while no significant differences were observed in streams S3 or S5.

## Supplementary Information & Data

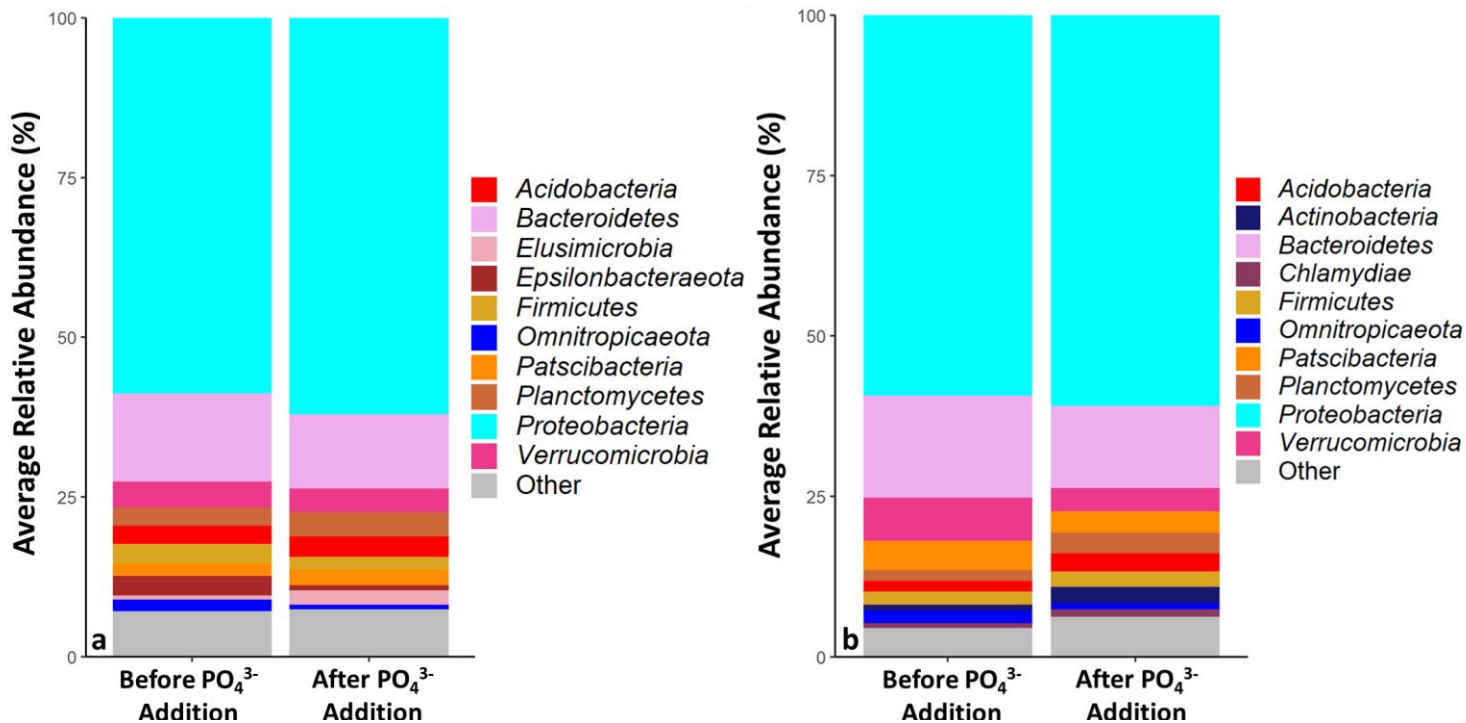

**Figure A3:** Top 10 most abundant phyla in urban streams a) S2 and b) S4 before and after PO<sub>4</sub><sup>3-</sup> addition in the distribution system. Significant changes in were observed in the relative abundances of *Elusimicrobia* and *Omnitropicaeota* in stream S2 while significant differences were observed in *Omnitropicaeota* and *Planctomycetes* in stream S4.

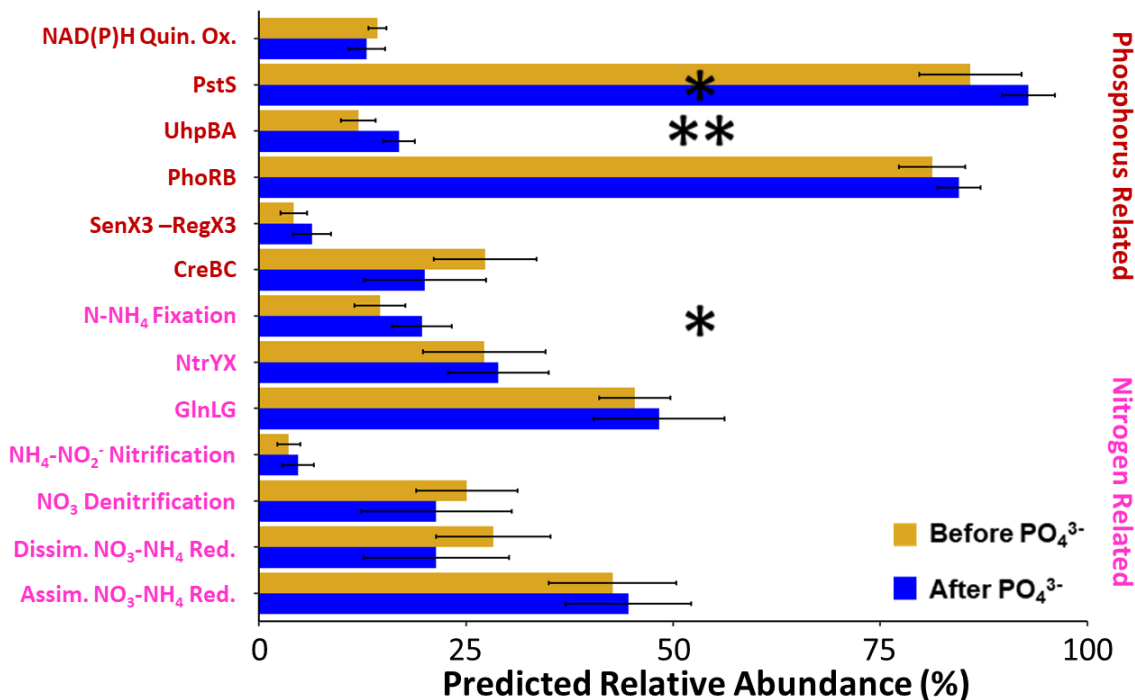

**Figure A4:** Average phosphorus and nitrogen functional trait relative abundance of stream S1 before and after PO<sub>4</sub><sup>3-</sup> addition into the distribution system. \* represents a p-value < 0.05, \*\* represents a p-value < 0.01.

## Supplementary Information & Data

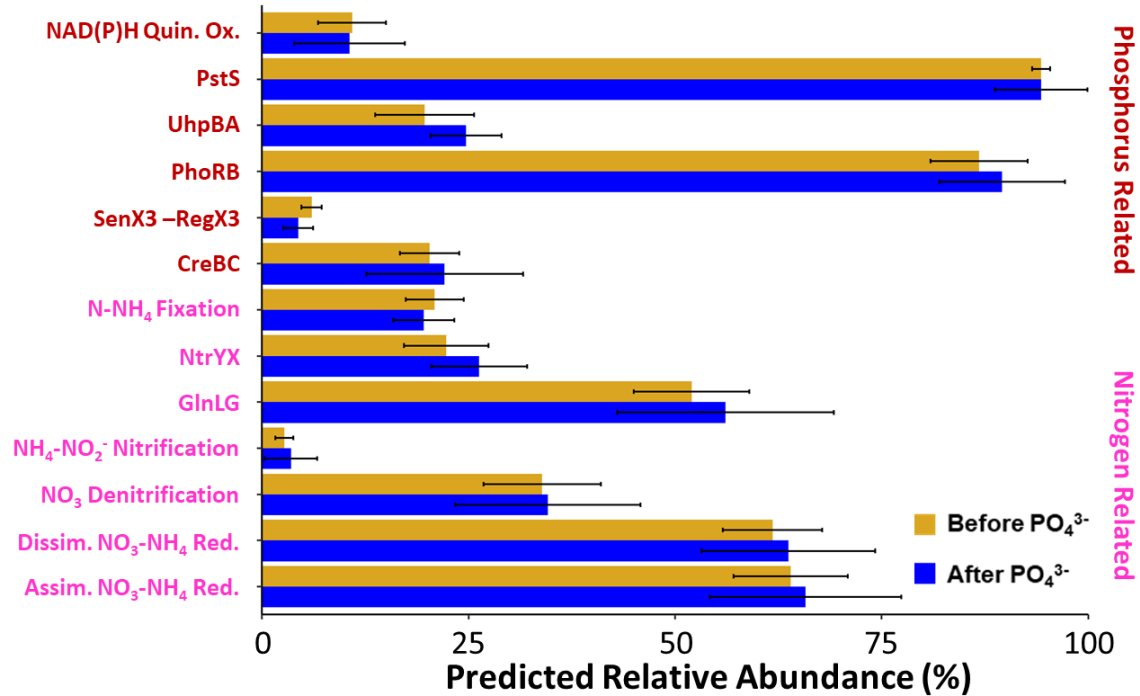

**Figure A5:** Average phosphorus and nitrogen functional trait relative abundance of stream S2 stream before and after PO<sub>4</sub><sup>3-</sup> addition into the distribution system.

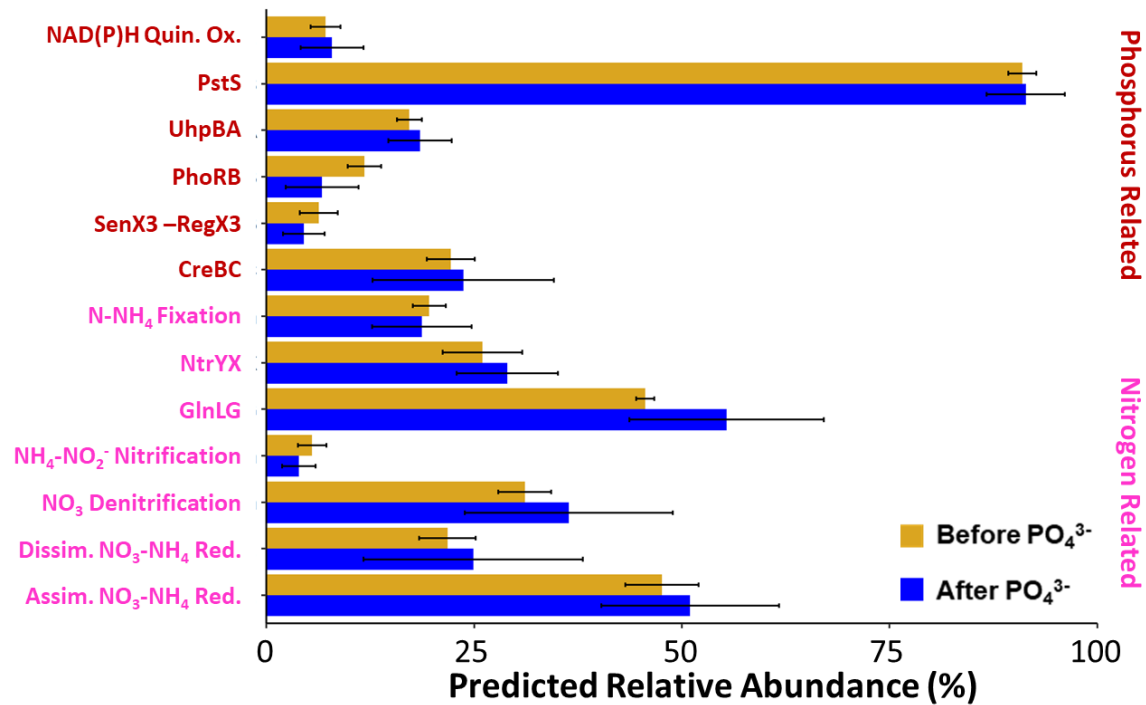

**Figure A6:** Average phosphorus and nitrogen functional trait relative abundance of stream S3 before and after PO<sub>4</sub><sup>3-</sup> addition into the distribution system.

## Supplementary Information & Data

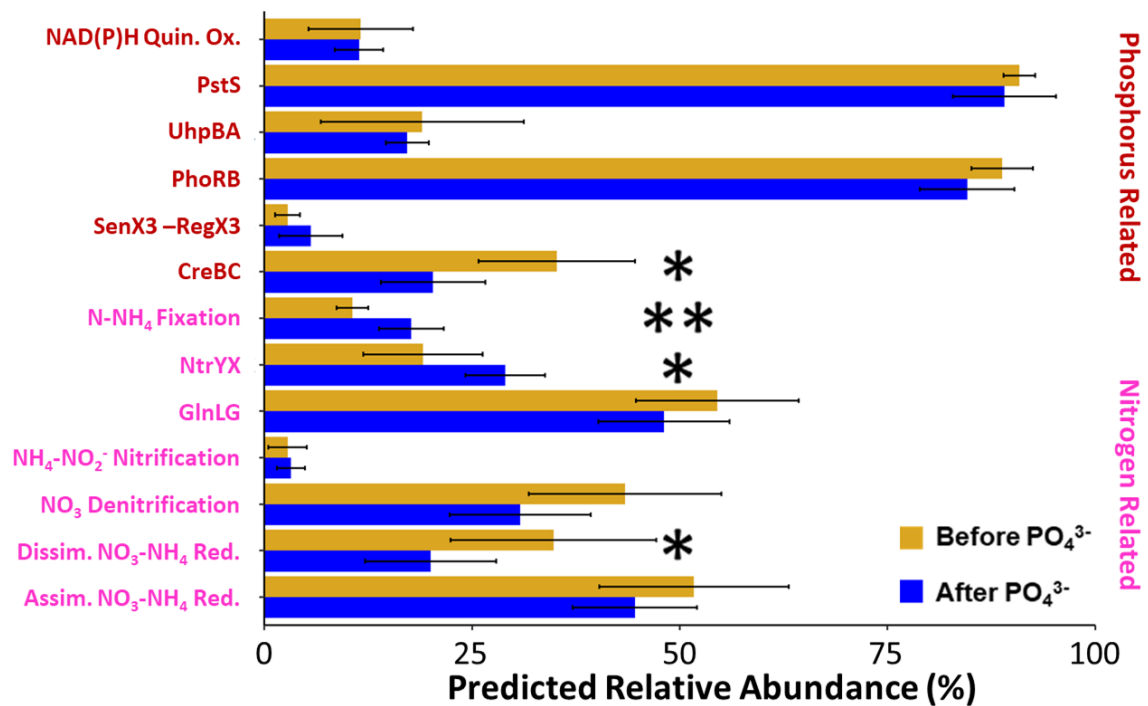

**Figure A7:** Average phosphorus and nitrogen functional trait relative abundance of stream S4 before and after PO<sub>4</sub><sup>3-</sup> addition into the distribution system. \* represents a p-value < 0.05, \*\* represents a p-value < 0.01.

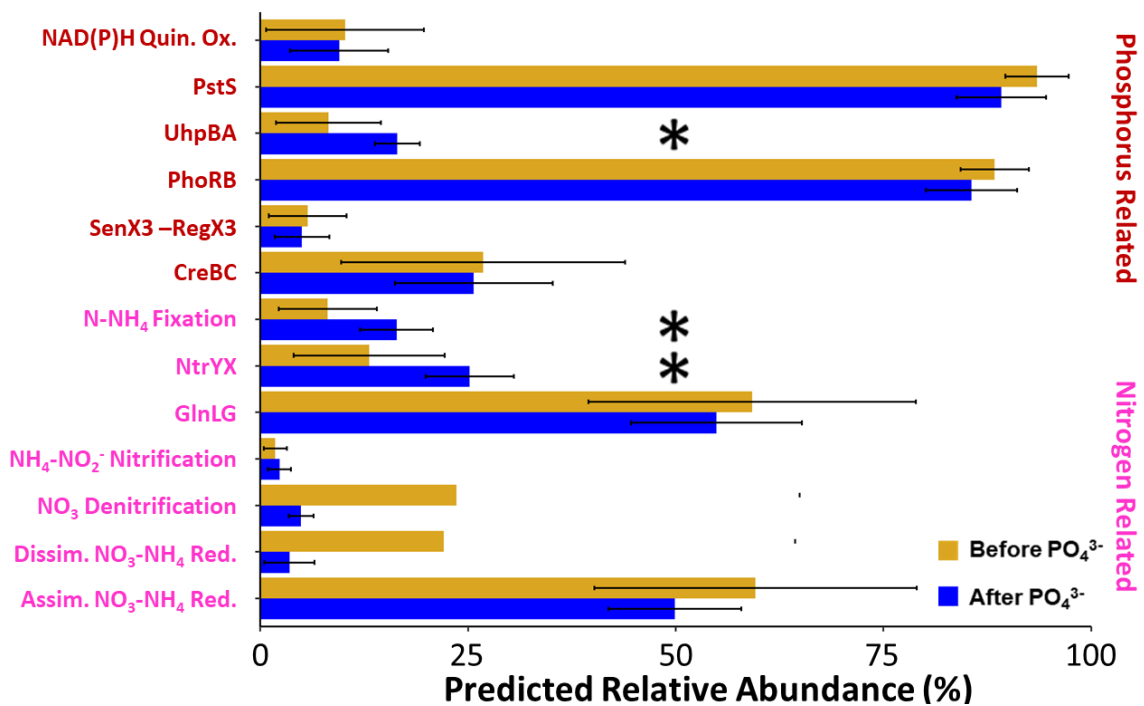

**Figure A8:** Average phosphorus and nitrogen functional trait relative abundance of stream S5 before and after PO<sub>4</sub><sup>3-</sup> addition into the distribution system. \* represents a p-value < 0.05.

## Supplementary Information & Data

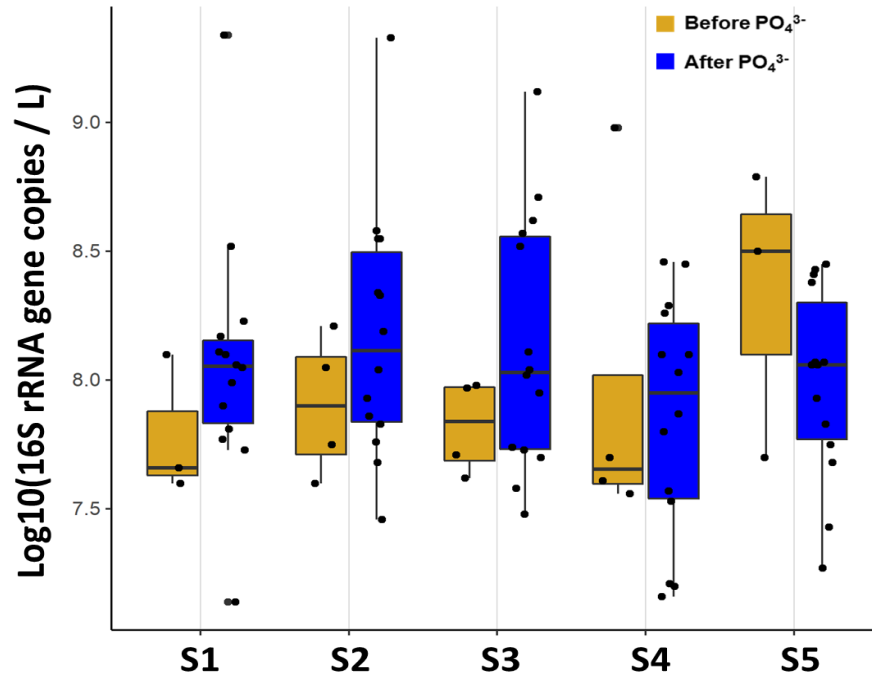

**Figure A9:** Total bacteria absolute abundance in urban streams before and after  $\text{PO}_4^{3-}$  addition into the distribution system. No significant differences were observed in any stream after  $\text{PO}_4^{3-}$  addition.

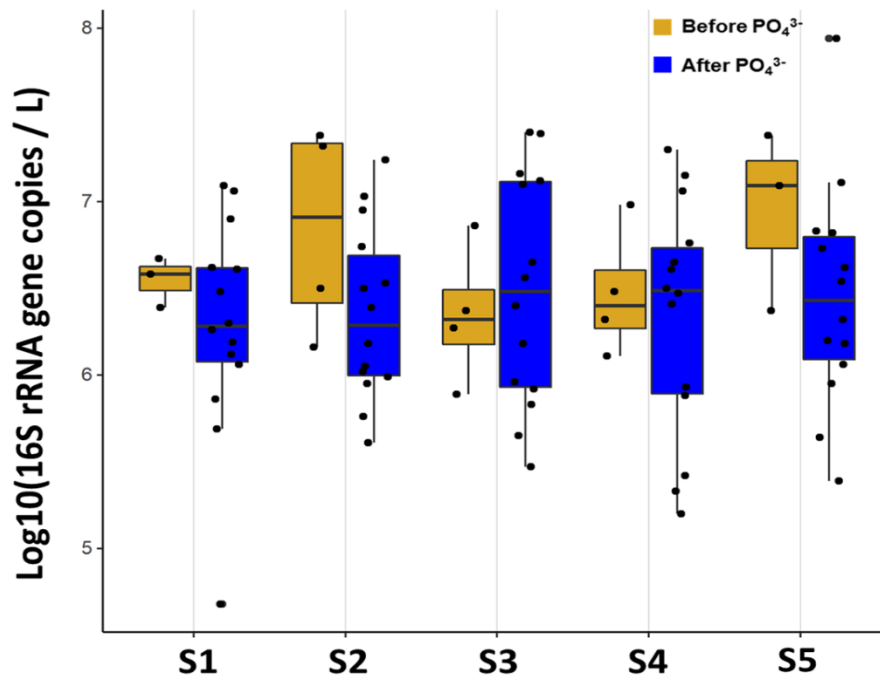

**Figure A10:** *Cyanobacteria* absolute abundance in urban streams before and after  $\text{PO}_4^{3-}$  addition into the distribution system. No significant differences were observed in any stream after  $\text{PO}_4^{3-}$  addition.

## Supplementary Information & Data

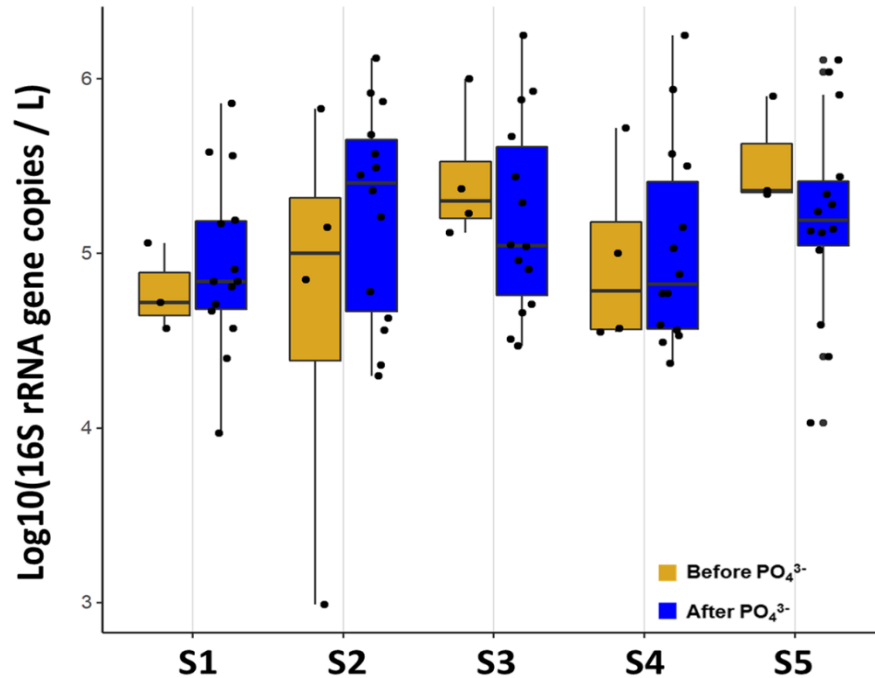

**Figure A11:** *Candidatus Accumulibacter* absolute abundance in urban streams before and after PO<sub>4</sub><sup>3-</sup> addition into the distribution system. No significant differences were observed in any stream after PO<sub>4</sub><sup>3-</sup> addition.

**Table A1: Urban stream longitude / latitude, population density, land development**

| Urban Stream           | Longitude   | Latitude   | Population Density<br>(person / km <sup>2</sup> ) | Land Development<br>Type                        |
|------------------------|-------------|------------|---------------------------------------------------|-------------------------------------------------|
| Shades Run (S1)        | -79.8839392 | 40.4809019 | 534.3                                             | Mixed Forest                                    |
| Negley Run (S2)        | -79.914260  | 40.467580  | 2604.6                                            | Developed, Medium<br>Intensity                  |
| Fern Hollow<br>(S3)    | -79.90017   | 40.43944   | 1514.7                                            | Mixed Forest /<br>Developed Medium<br>Intensity |
| Panther Hollow<br>(S4) | -79.9481072 | 40.4367358 | 2822.5                                            | Developed, Medium<br>Intensity                  |
| Phipps Run (S5)        | -79.94562   | 40.43801   | 0.00                                              | Developed, Open<br>Space                        |



## Supplementary Information & Data

**Table A2: Water quality parameters measured, method / apparatus, and rationale**

| <b>Parameter</b>                       | <b>Unit</b>         | <b>Method / Apparatus</b> | <b>Rationale</b>              |
|----------------------------------------|---------------------|---------------------------|-------------------------------|
| <i>Temperature</i>                     | °C                  | YSI multiparameter sonde  | Stream water characterization |
| <i>pH</i>                              | --                  | YSI multiparameter sonde  | Stream water characterization |
| <i>Dissolved Oxygen</i>                | mg/L O <sub>2</sub> | YSI multiparameter sonde  | Stream water characterization |
| <i>Total Reactive Phosphorus</i>       | µg/L P              | Lachat QuikChem Analyzer  | Stream water characterization |
| <i>Soluble Reactive Phosphorus</i>     | µg/L P              | Lachat QuikChem Analyzer  | Stream water characterization |
| <i>Total Phosphorus</i>                | µg/L P              | Lachat QuikChem Analyzer  | Stream water characterization |
| <i>Ammonia</i>                         | mg/L N              | Lachat QuikChem Analyzer  | Stream water characterization |
| <i>Nitrate &amp; Nitrite</i>           | mg/L N              | Lachat QuikChem Analyzer  | Stream water characterization |
| <i>Chloride</i>                        | mg/L                | Lachat QuikChem Analyzer  | Stream water characterization |
| <i>Sulfate</i>                         | mg/L                | Lachat QuikChem Analyzer  | Stream water characterization |
| <i>Bromide</i>                         | mg/L                | Lachat QuikChem Analyzer  | Stream water characterization |
| <i>Phosphate (IC)</i>                  | mg/L                | Dionex Ion Chromatograph  | Stream water characterization |
| <i>Nitrogen Dioxide (IC)</i>           | mg/L                | Dionex Ion Chromatograph  | Stream water characterization |
| <i>Nitrate (IC)</i>                    | mg/L                | Dionex Ion Chromatograph  | Stream water characterization |
| <i>Total &amp; Dissolved Iron</i>      | mg/L                | ICP-MS                    | Stream water characterization |
| <i>Total &amp; Dissolved Copper</i>    | mg/L                | ICP-MS                    | Stream water characterization |
| <i>Total &amp; Dissolved Manganese</i> | mg/L                | ICP-MS                    | Stream water characterization |
| <i>Total &amp; Dissolved Lead</i>      | mg/L                | ICP-MS                    | Stream water characterization |

## Supplementary Information & Data

**Table A3: ddPCR primers**

| Use            | Primer Name | Annealing Temperatures (°C) | Sequence (5' to 3')       |
|----------------|-------------|-----------------------------|---------------------------|
| Forward Primer | EUB338      | 57                          | ACTCCTACGGGAGGCAG         |
| Reverse Primer | EUB518      | 57                          | ATTACCGCGGCTGCTGG         |
| Forward Primer | CYA359F     | 60                          | GGGGAATYTTCCGCAATGGG      |
| Reverse Primer | CYA781R_ab  | 60                          | GACTACWGGGGTATCTAATCCCWTT |
| Forward Primer | 518f        | 60                          | CCAGCAGCCGCGGTAAT         |
| Reverse Primer | PAO-846r    | 60                          | GTTAGCTACGGCACTAAAAGG     |

**Table A4: ddPCR reaction conditions**

| Target taxa (gene)               | Temperatures and Times | # of cycles |
|----------------------------------|------------------------|-------------|
| Total Bacteria                   | 95°C, 5:00, Ramp 2/s   | 45          |
|                                  | 95°C, 0:30, Ramp 2/s   |             |
|                                  | 57°C, 1:00, Ramp 2/s   |             |
|                                  | 72°C, 1:00, Ramp 2/s   |             |
|                                  | 4°C, 5:00, Ramp 2/s    |             |
|                                  | 90°C, 5:00, Ramp 2/s   |             |
|                                  | 12°C, --, Ramp 2/s     |             |
| <i>Cyanobacteria</i>             | 95°C, 5:00, Ramp 2/s   | 44          |
|                                  | 95°C, 0:30, Ramp 2/s   |             |
|                                  | 60°C, 1:00, Ramp 2/s   |             |
|                                  | 72°C, 1:00, Ramp 2/s   |             |
|                                  | 4°C, 5:00, Ramp 2/s    |             |
|                                  | 90°C, 5:00, Ramp 2/s   |             |
|                                  | 12°C, --, Ramp 2/s     |             |
| <i>Candidatus Accumulibacter</i> | 95°C, 5:00, Ramp 2/s   | 44          |
|                                  | 95°C, 0:30, Ramp 2/s   |             |
|                                  | 60°C, 1:00, Ramp 2/s   |             |
|                                  | 72°C, 1:00, Ramp 2/s   |             |
|                                  | 4°C, 5:00, Ramp 2/s    |             |
|                                  | 90°C, 5:00, Ramp 2/s   |             |
|                                  | 12°C, --, Ramp 2/s     |             |

## Supplementary Information & Data

**Table A5: ddPCR assay thresholds**

| <b>Target taxa (gene)</b>        | <b>ddPCR Threshold</b> | <b>Limit of Detection</b>    |
|----------------------------------|------------------------|------------------------------|
| Total Bacteria                   | 12900                  | 5.3 gene copies / 20 $\mu$ L |
| <i>Cyanobacteria</i>             | 9567                   | 7.9 gene copies / 20 $\mu$ L |
| <i>Candidatus Accumulibacter</i> | 7632                   | 1.1 gene copies / 20 $\mu$ L |

**Table A6: Module list of functional traits relating to phosphate or nitrogen metabolism**

| <b>BugBase Module ID</b> | <b>Module Name</b>                                             |
|--------------------------|----------------------------------------------------------------|
| M00145                   | NADPH Quinone Oxidoreductase in Chloroplasts and Cyanobacteria |
| M00175                   | Nitrogen Fixation: Nitrogen-Ammonia                            |
| M00222                   | Phosphate Transport System                                     |
| M00434                   | PhoRB Phosphate Starvation Response                            |
| M00438                   | Nitrate-Nitrite Transport System                               |
| M00443                   | SenX3-RegX3 Phosphate Starvation Response                      |
| M00449                   | CreBC Phosphate Regulation                                     |
| M00473                   | UhpBA Hexose Phosphate Uptake                                  |
| M00497                   | GlnLG Nitrogen Regulation                                      |
| M00498                   | NtrYX Nitrogen Regulation                                      |
| M00524                   | FixLJ Nitrogen Fixation                                        |
| M00528                   | Ammonia-Nitrite Nitrification                                  |
| M00529                   | Nitrate-Nitrogen Denitrification                               |
| M00530                   | Dissimilatory Nitrate Reduction: Nitrate-Ammonia               |
| M00531                   | Assimilatory Nitrate Reduction: Nitrate-Ammonia                |
